# Supplementary material for: A pentaquinone based probe for relay recognition of F− and Cu2+ ions: sequential logic operations at the molecular level
Source: Royal Society of Chemistry journal article supplement (doi:10.1039/c3dt51070k), 2013-01-01
Supplement: c3dt51070k.pdf [file c3dt51070k.pdf]

## Supporting Information

### Pentaquinone based probe for relay recognition of F<sup>-</sup> and Cu<sup>2+</sup> ions: Sequential logic operations at molecular level

Vandana Bhalla,\* Roopa and Manoj Kumar\*

Department of Chemistry, UGC Sponsored-Centre for Advanced Studies-I, Guru Nanak Dev  
University, Amritsar-143005, Punjab, INDIA

#### Page no. Contents

- S3** <sup>1</sup>H NMR spectrum of receptor **2a**. (**Figure S1**)
- S4** IR spectrum of receptor **2a**. (**Figure S2**)
- S5** Mass spectrum of receptor **2a**. (**Figure S3**)
- S6** UV-vis spectra of **2a** in the presence of Bu<sub>4</sub>NOH in DMSO. (**Figure S4**)
- S7** UV-vis spectra of **2a** in the presence of different anions in DMSO. (**Figure S5**)
- S8** Fluorescence response of **2b** (5 μM) in the presence of OH<sup>-</sup> ions. (**Figure S6**)
- S9** Partial <sup>1</sup>H NMR spectra of **2a** in DMSO (A) **2a** (B) **2a** + 1.0 equiv F<sup>-</sup>. (**Figure S7**)
- S10** Fluorescence response of **2b** (5 μM) in the presence of F<sup>-</sup> ions. (**Figure S8**)
- S10** UV-vis spectra of **2a** in the presence of F<sup>-</sup> ions in DMSO/H<sub>2</sub>O. (**Figure S9**)
- S10** UV-vis spectra of **3** in the presence of Cu<sup>2+</sup> ions in DMSO/H<sub>2</sub>O. (**Figure S10**)
- S11** Fluorescence response of **2a** towards F<sup>-</sup> ions in DMSO/H<sub>2</sub>O. (**Figure S11**)
- S11** Fluorescence response of **3** towards Cu<sup>2+</sup> ions in DMSO/H<sub>2</sub>O. (**Figure S12**)
- S11** Fluorescence response of **2a** (5 μM) in the presence of various anions. (**Figure S13**)
- S12** UV-vis response of **2a** towards in the presence of various metal ions. (**Figure S14**)
- S12** Fluorescence response of **2a** (5 μM) in the presence of various metal ions. (**Figure S15**)
- S12** Mass spectrum of **2a**-Cu<sup>2+</sup> complex. (**Figure S16**)
- S13** Job's Plot of **3** with Cu<sup>2+</sup> ions in DMSO. (**Figure S17**)

**S14** Fluorescence response of **3** towards various metal ions (10 equiv each) in DMSO. (**Figure S18**)

**S15** Fluorescence response of receptor **2a** on addition of OH<sup>-</sup> ions in DMSO (**Figure S19**)

**S16** Fluorescence response of receptor **3** on addition of Cu<sup>2+</sup> ions in DMSO (**Figure S20**)

**S17** Fluorescence response of receptor **3** + Cu<sup>2+</sup> on addition of OH<sup>-</sup> ions in DMSO (**Figure S21**)

**S18** UV-vis spectra showing reusability of the receptor **2a** for the sensing of F<sup>-</sup> and Cu<sup>2+</sup> ions sequentially in DMSO (**Figure S22-S25**)

**S19** UV-vis response of **3** on addition of Cu<sup>2+</sup> ions in DMSO (**Figure S26**)

**S20** Fluorescence response of **2a** on addition of ClO<sub>4</sub><sup>-</sup> ions in DMSO (**Figure S27**)

**Figure S1.**  $^1\text{H}$  NMR (DMSO, 300 MHz, ppm) spectrum of **2a**.

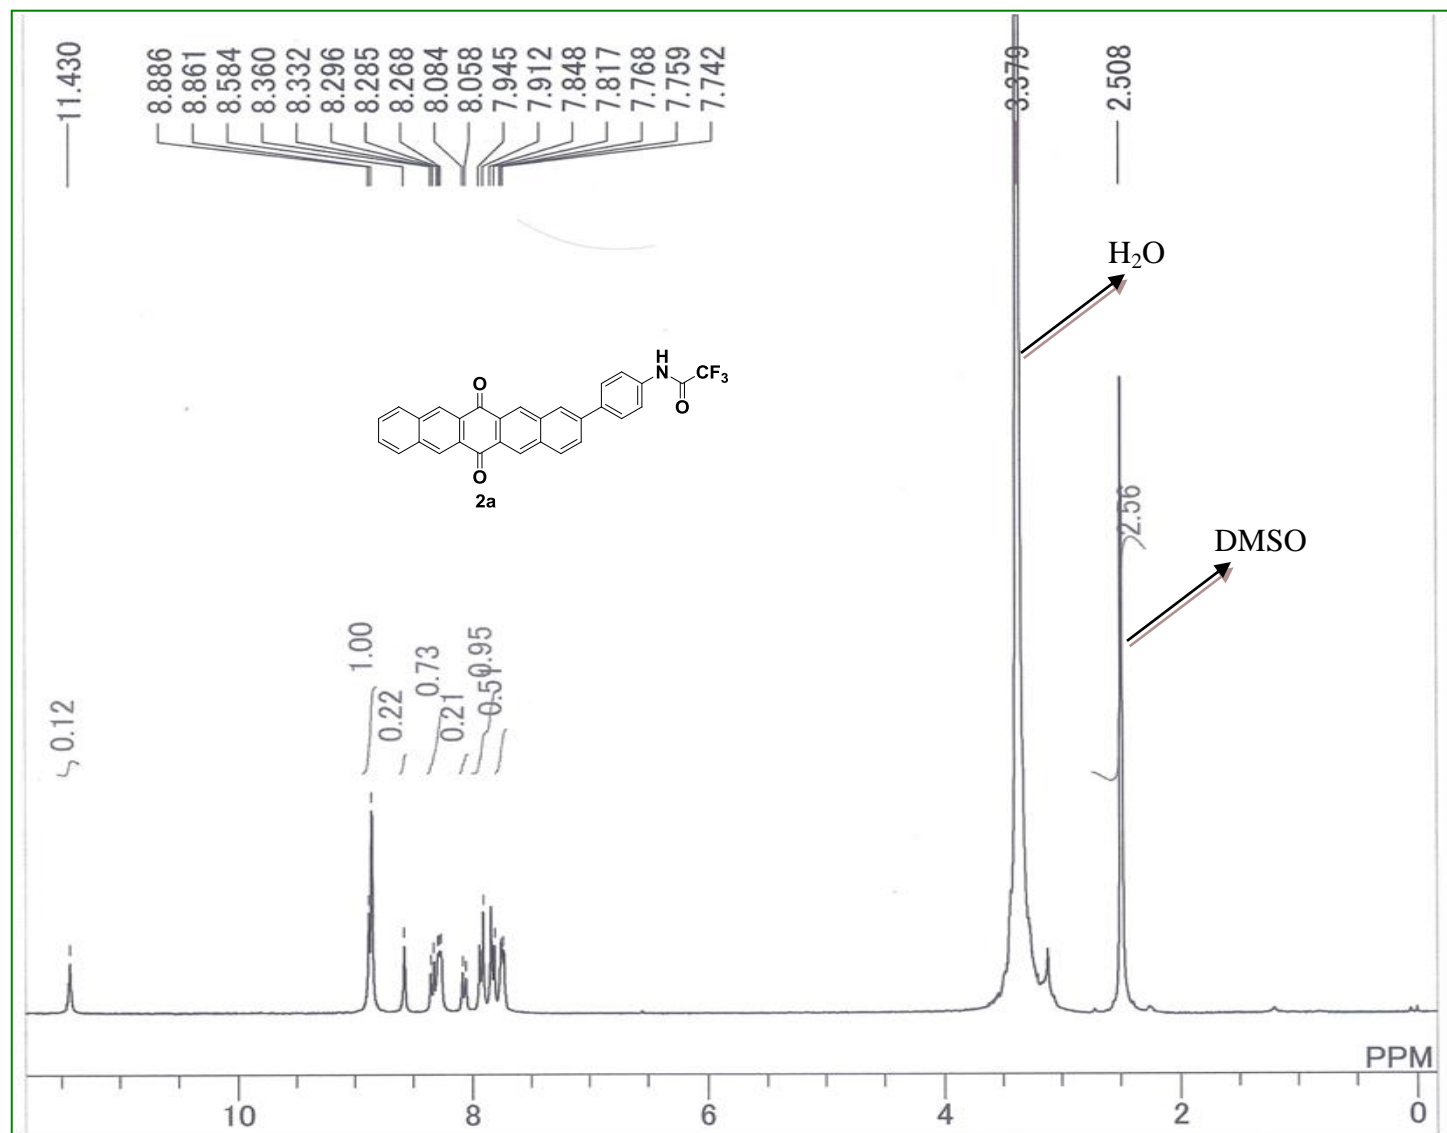

**Figure S2.** IR spectrum of **2a**.

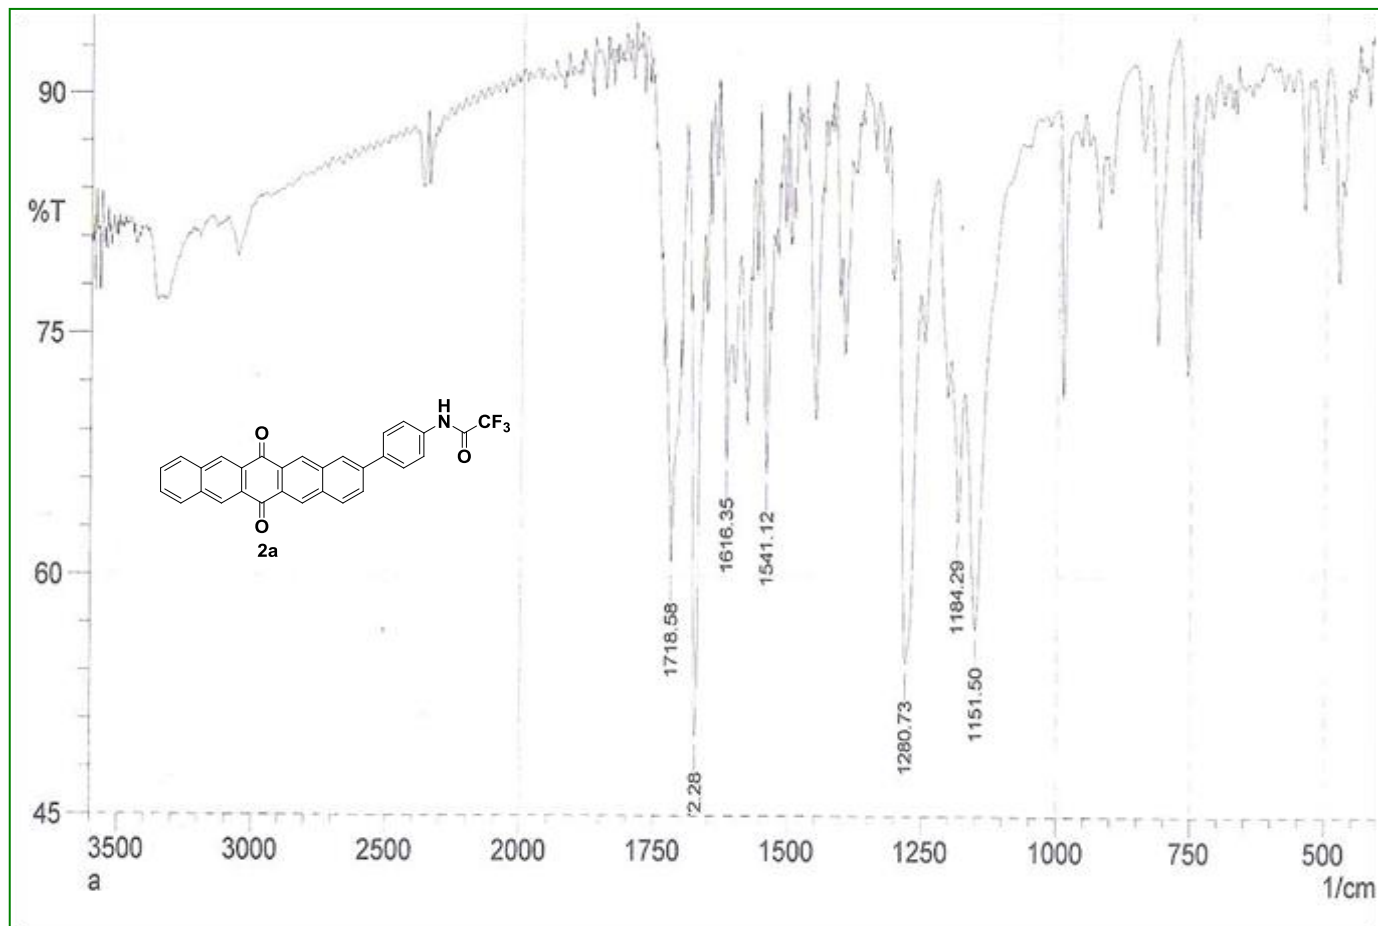

Figure S3. MALDI-TOF mass spectrum of **2a**.

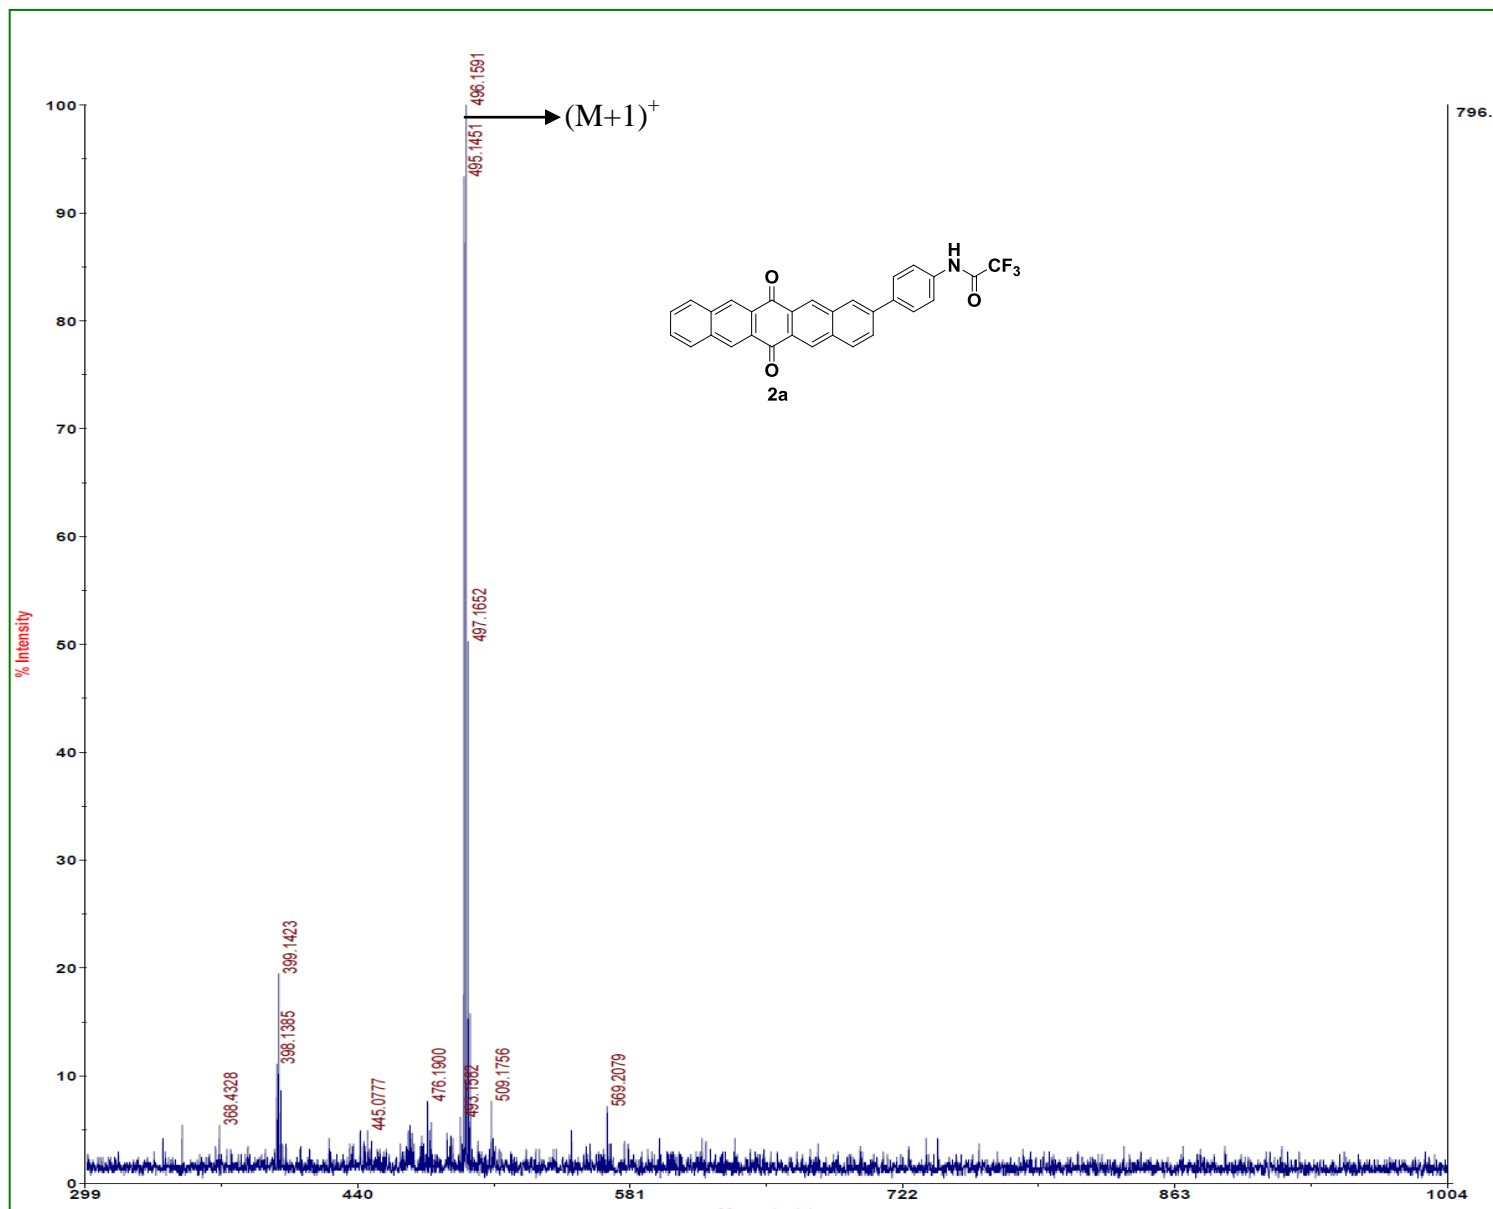

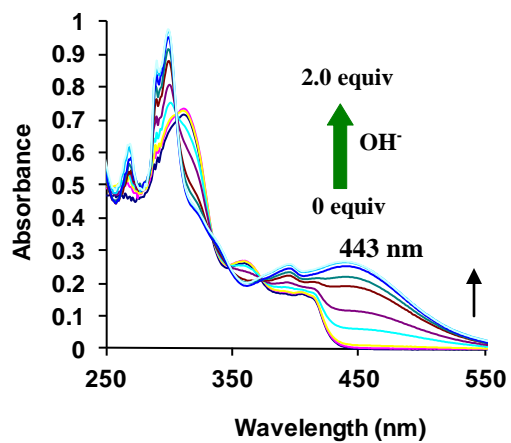

**Figure S4.** UV-vis response of receptor **2a** (5 μM) on addition of OH<sup>-</sup> ions (0-2.0 equiv) in DMSO.

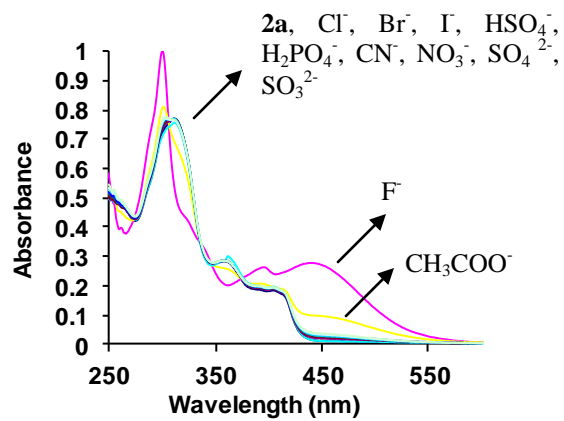

**Figure S5.** UV-vis spectra of **2a** (5 μM) in response to the presence of different anions (3.0 equiv each) in DMSO.

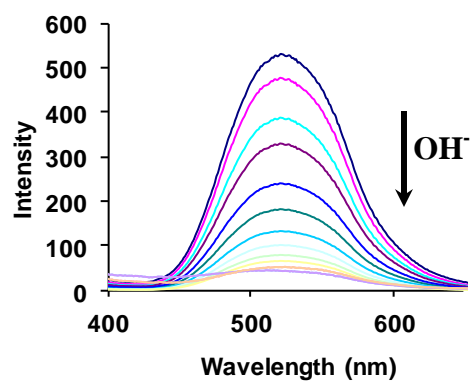

**Figure S6.** Fluorescence response of **2a** (5 μM) in the presence of OH<sup>-</sup> ions (0-7.5 equiv) in DMSO.



**Figure S7.** Partial  $^1\text{H}$  NMR spectra of **2a** in DMSO (A) **2a** (B) **2a** + 1.0 equiv  $\text{F}^-$

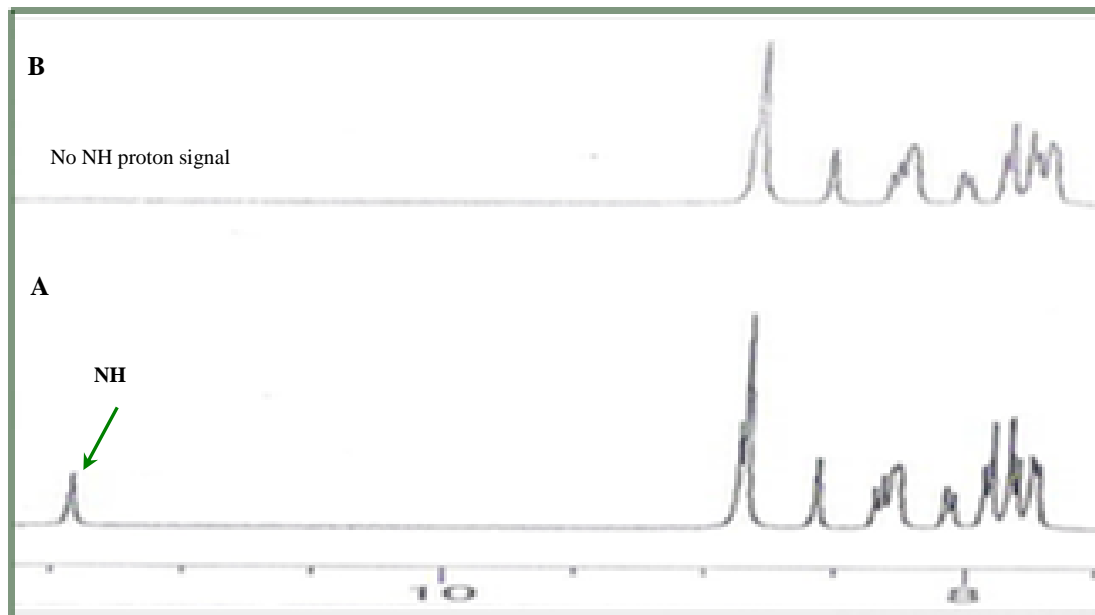

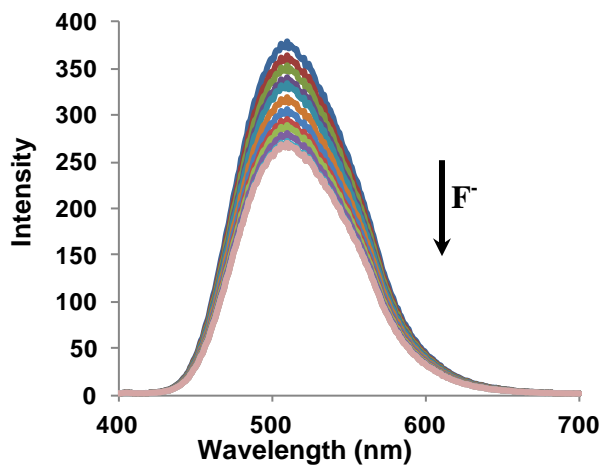

**Figure S8.** Fluorescence response of **2b** (5 μM) in the presence of F<sup>-</sup> ions (0-100 equiv) in DMSO.

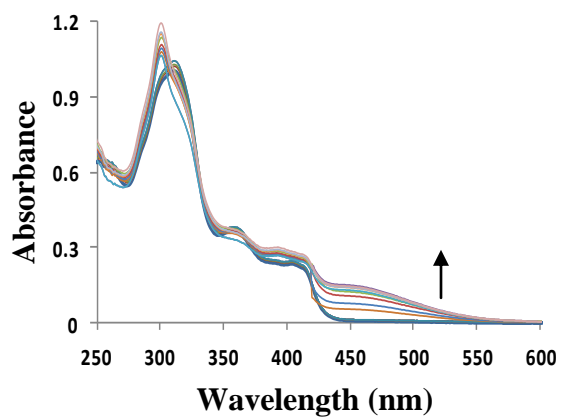

**Figure S9.** UV-vis response of receptor **2a** (10  $\mu$ M) on addition of  $F^-$  ions (0-350 equiv) in DMSO/ $H_2O$  (9.5:0.5, v:v).

S

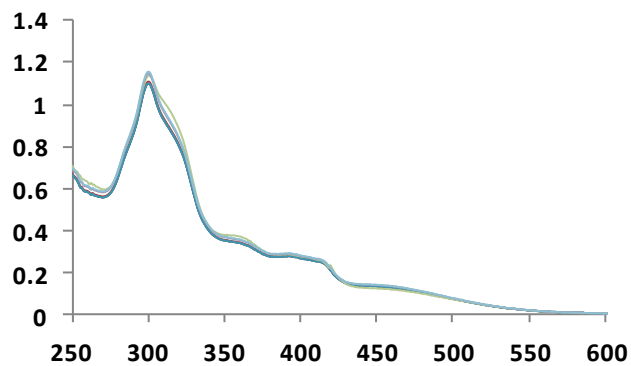

**Figure S10.** UV-vis response of **3** on addition of  $Cu^{2+}$  ions (0-350 equiv) in DMSO/ $H_2O$  (9.5:0.5, v:v).

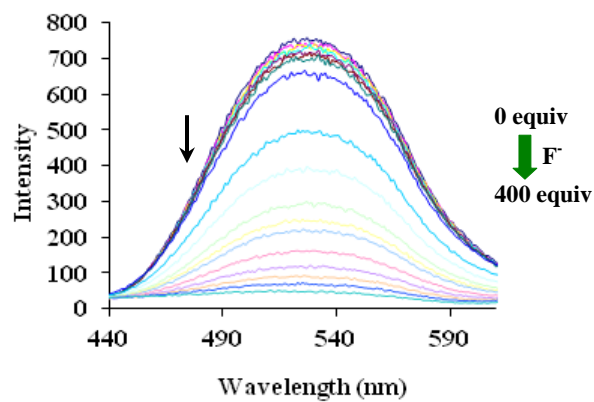

**Figure S11.** Fluorescence response of receptor **2a** (10  $\mu\text{M}$ ) on addition of  $\text{F}^-$  ions (0-400 equiv) in DMSO/ $\text{H}_2\text{O}$  (9.5:0.5, v:v);  $\lambda_{\text{ex}} = 310 \text{ nm}$ .

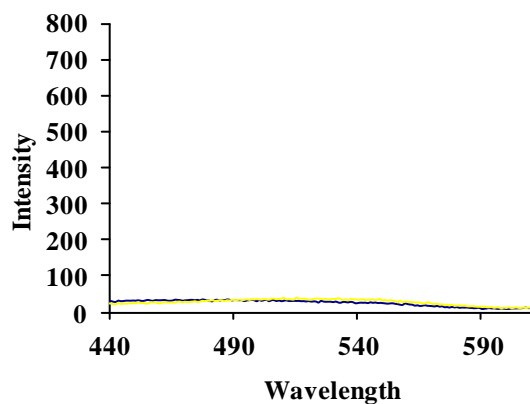

**Figure S12.** Fluorescence response of **3** on addition of  $\text{Cu}^{2+}$  ions (0-500 equiv) in DMSO/ $\text{H}_2\text{O}$  (9.5:0.5, v:v);  $\lambda_{\text{ex}} = 310 \text{ nm}$ .

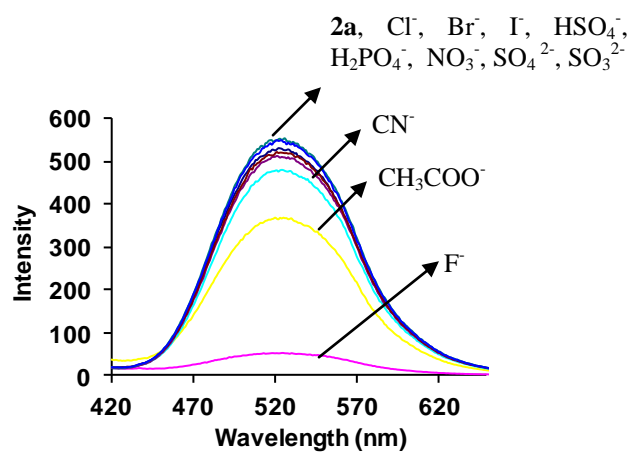

**Figure S13.** Fluorescence spectra of **2a** (5  $\mu\text{M}$ ) in response to the presence of different anions (12 equiv each) in DMSO.

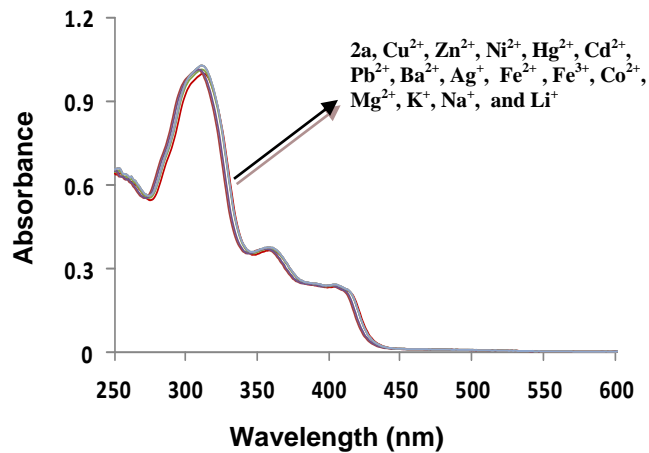

**Figure S14.** UV-vis response of **2a** (5  $\mu\text{M}$ ) in the presence of various metal ions (0-50 equiv) in DMSO.

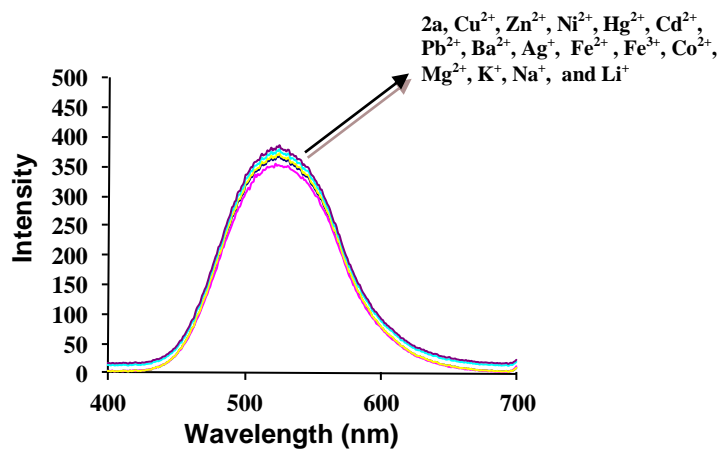

**Figure S15.** Fluorescence response of **2a** (5  $\mu\text{M}$ ) in the presence of various metal ions (0-50 equiv) in DMSO.

**Figure S16.** Mass spectrum of **2a**-Cu<sup>2+</sup> complex.

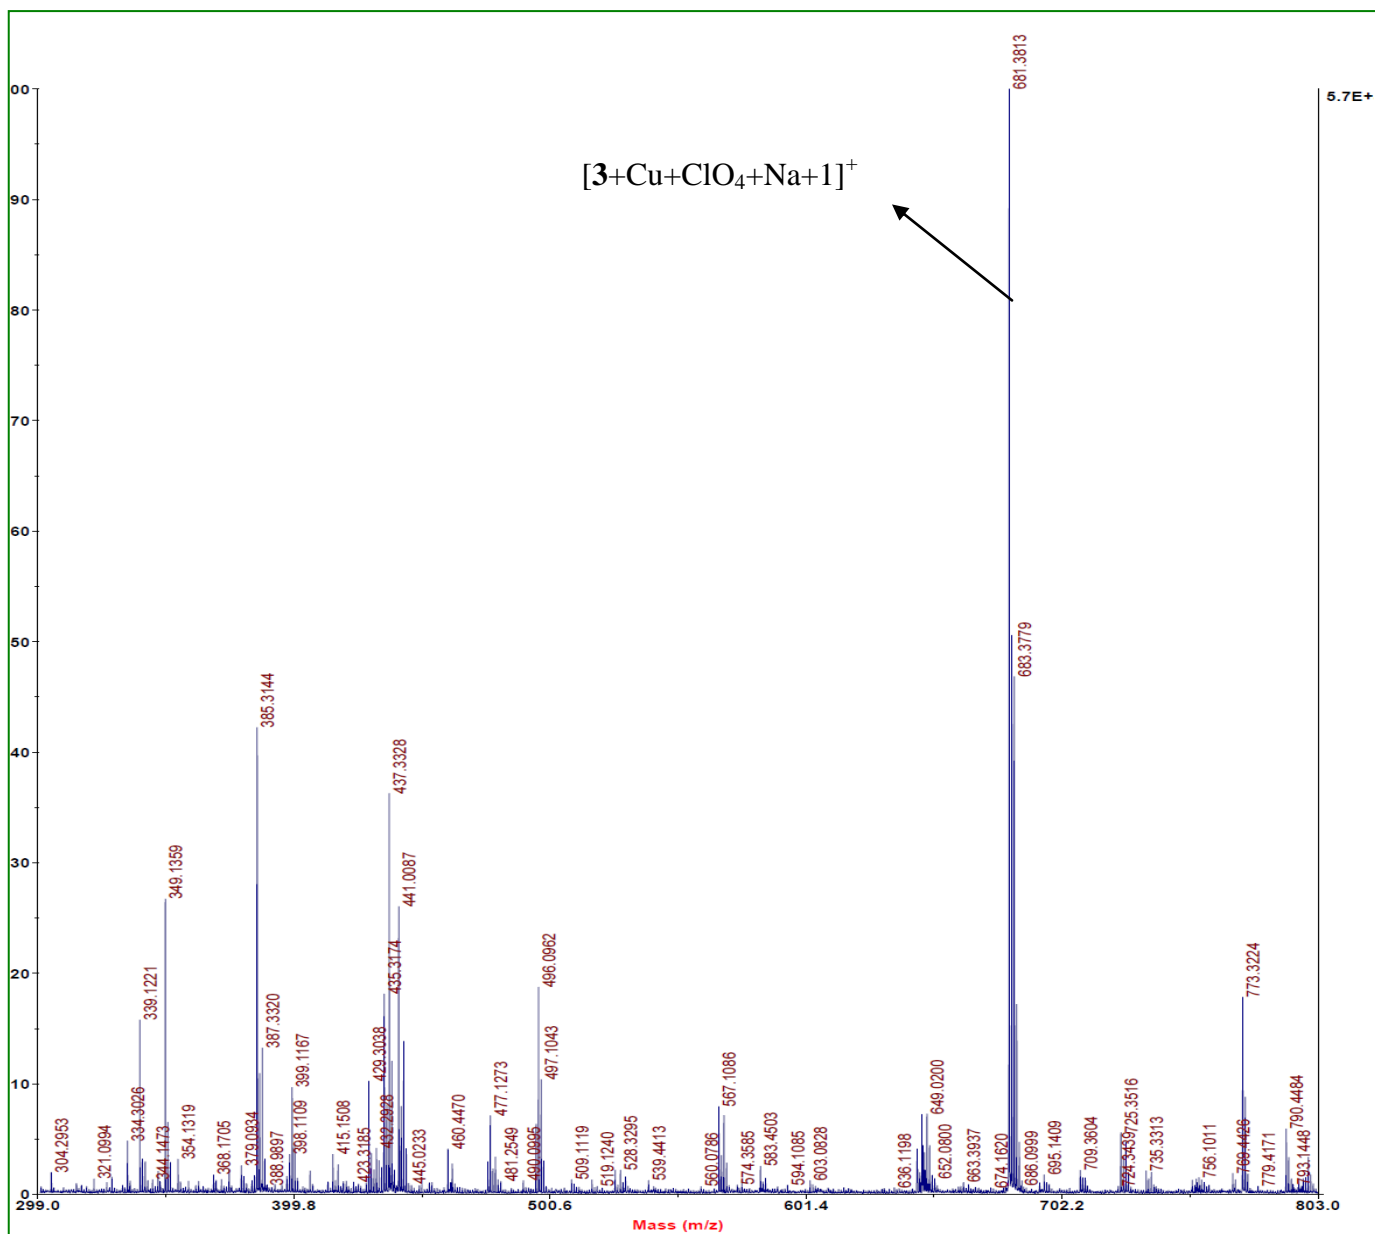

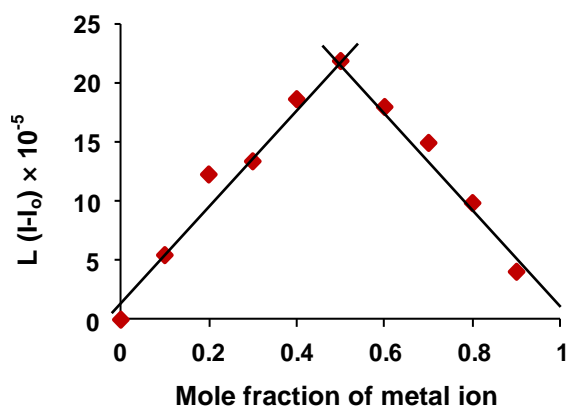

**Figure S17.** Job's plot of **3** with  $\text{Cu}^{2+}$  ions in DMSO representing stoichiometry 1:1.



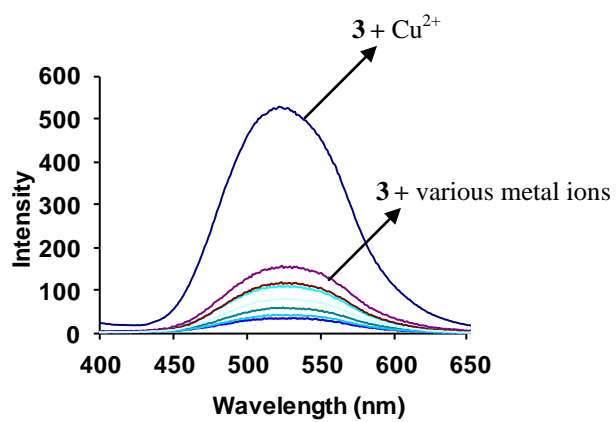

**Figure S18.** Fluorescence response of **3** towards various metal ions (10 equiv each) in DMSO.

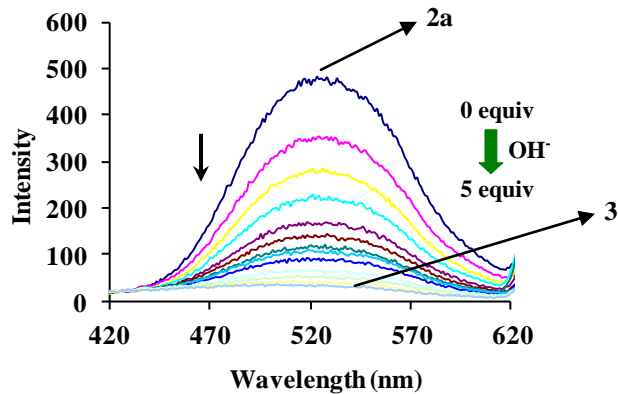

**Figure S19.** Fluorescence response of receptor **2a** (5 μM) on addition of OH<sup>-</sup> ions (0-5.0 equiv) in DMSO;  $\lambda_{\text{ex}} = 310$  nm.

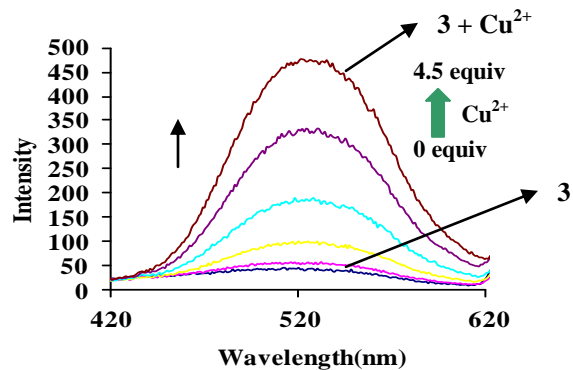

**Figure S20.** Fluorescence response of receptor **3** on addition of Cu<sup>2+</sup> ions (0-4.5 equiv) in DMSO;  $\lambda_{\text{ex}} = 310$  nm.

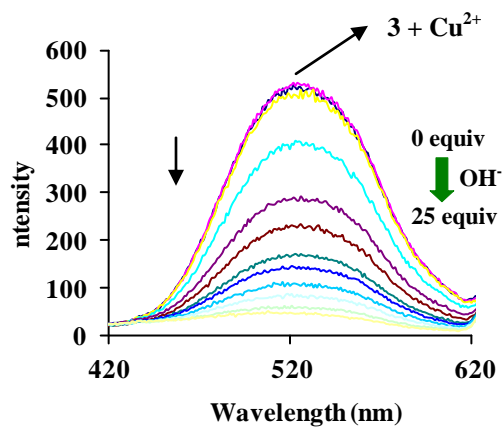

**Figure S21.** Fluorescence response of receptor **3 + Cu<sup>2+</sup>** on addition of OH<sup>-</sup> ions (0-25 equiv) in DMSO;  $\lambda_{\text{ex}} = 310$  nm.

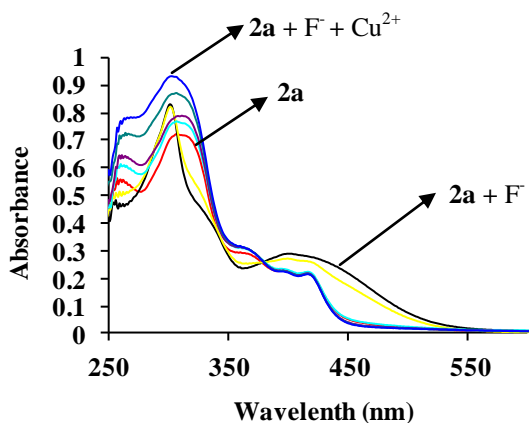

**Figure S22.** UV-vis response of receptor **2a** (5  $\mu$ M) on addition of F<sup>-</sup> ions (0-3.0eq) and further addition of Cu<sup>2+</sup> ions (0-8.0 equiv) to the solution of **2a** + F<sup>-</sup> in DMSO.

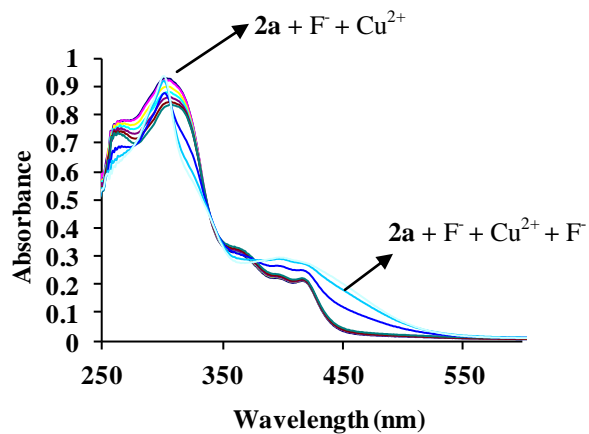

**Figure S23.** UV-vis response of **2a** + F<sup>-</sup> + Cu<sup>2+</sup> towards the addition of F<sup>-</sup> ions (0-55 equiv) in DMSO.

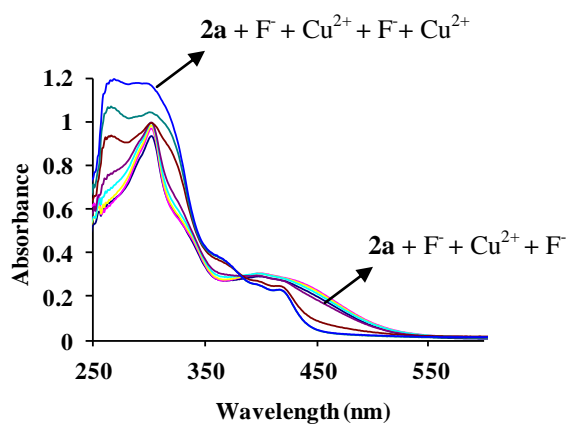

**Figure S24.** UV-vis response of **2a** + F<sup>-</sup> + Cu<sup>2+</sup> + F<sup>-</sup> towards the addition of Cu<sup>2+</sup> ions (0-50 equiv) in DMSO.

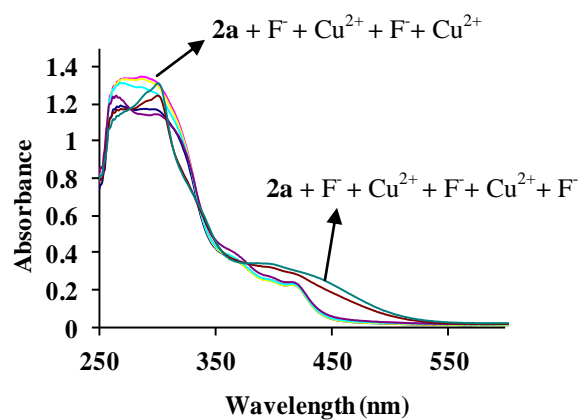

**Figure S25.** UV-vis response of **2a** + F<sup>-</sup> + Cu<sup>2+</sup> + F<sup>-</sup> + Cu<sup>2+</sup> towards the addition of F<sup>-</sup> ions (0-200 equiv) in DMSO.

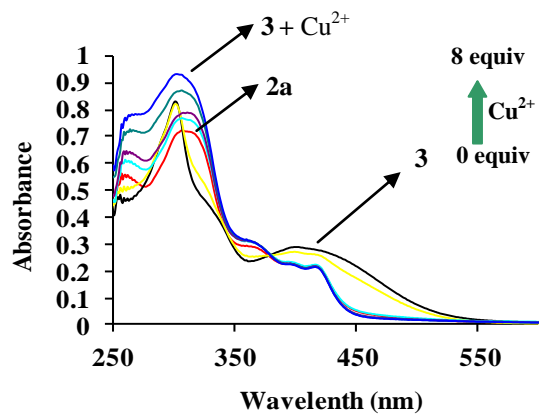

**Figure S26.** UV-vis response of **3** (15 μM) on addition of Cu<sup>2+</sup> ions (0-8.0 equiv) in DMSO.

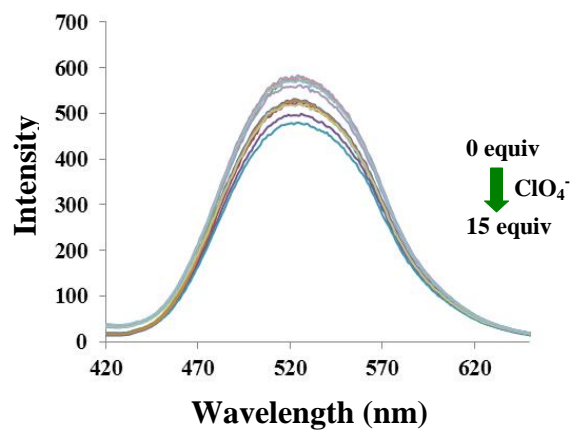

**Figure S27.** Fluorescence response of receptor **2a** (5  $\mu\text{M}$ ) on addition of  $\text{ClO}_4^-$  ions (15 equiv) in DMSO;  $\lambda_{\text{ex}} = 310 \text{ nm}$ .
